# Supplementary material for: The LmSNF1 Gene Is Required for Pathogenicity in the Canola Blackleg Pathogen Leptosphaeria maculans
Source: PubMed Central journal article supplement (PMC3956939; doi:10.1371/journal.pone.0092503), 2014-03-17
Supplement: pone.0092503.s001.pdf [file pone.0092503.s001.pdf]

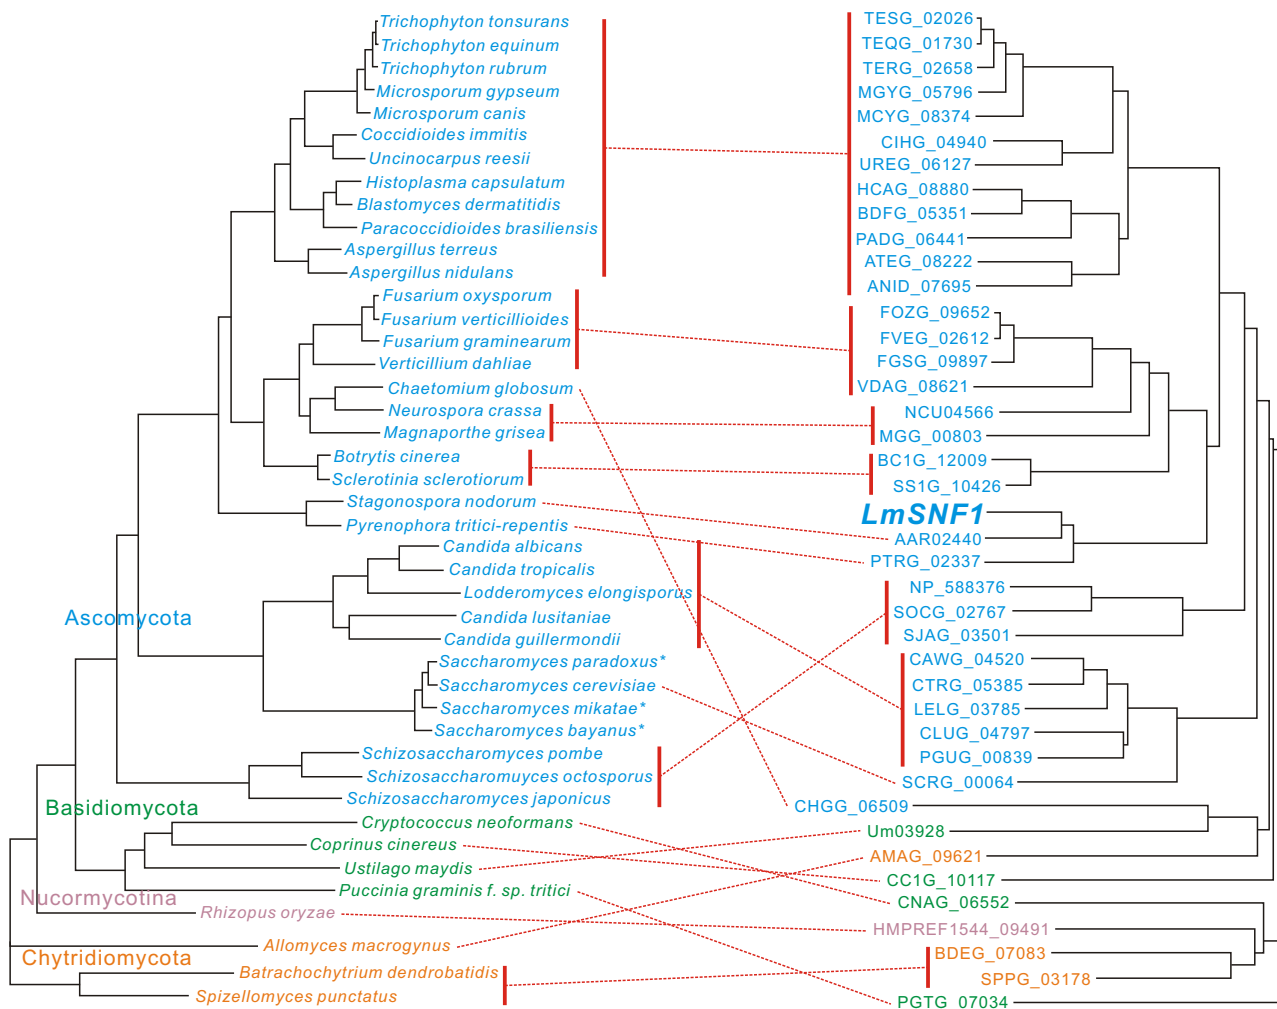

**Figure S1.** Comparison of the fungal phylogenetic tree based on sequences of 70 protein encoding genes (left) and the tree based on *SNF1* sequences (right). Clades identical in the two trees are connected by dotted lines.
