# Supplementary material for: The LmSNF1 Gene Is Required for Pathogenicity in the Canola Blackleg Pathogen Leptosphaeria maculans
Source: PubMed Central journal article supplement (PMC3956939; doi:10.1371/journal.pone.0092503), 2014-03-17
Supplement: pone.0092503.s002.pdf [file pone.0092503.s002.pdf]

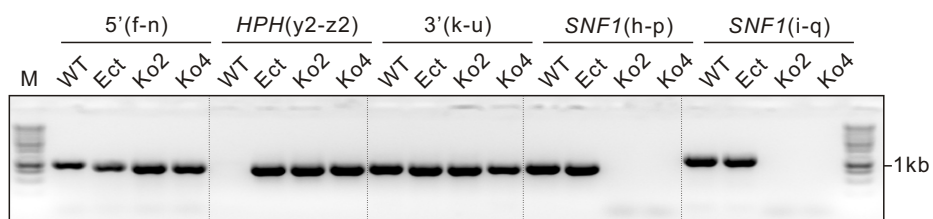

**Figure S2.** PCR analysis of *LmSNF1* gene knockout mutants of *Leptosphaeria maculans*. WT, the wild-type; Ect, the ectopic insertion strain; Ko, *LmSNF1* knockout strains. Labels on top indicate the target genes (forward/reverse primers).
