# Supplementary material for: The LmSNF1 Gene Is Required for Pathogenicity in the Canola Blackleg Pathogen Leptosphaeria maculans
Source: PubMed Central journal article supplement (PMC3956939; doi:10.1371/journal.pone.0092503), 2014-03-17
Supplement: pone.0092503.s003.pdf [file pone.0092503.s003.pdf]

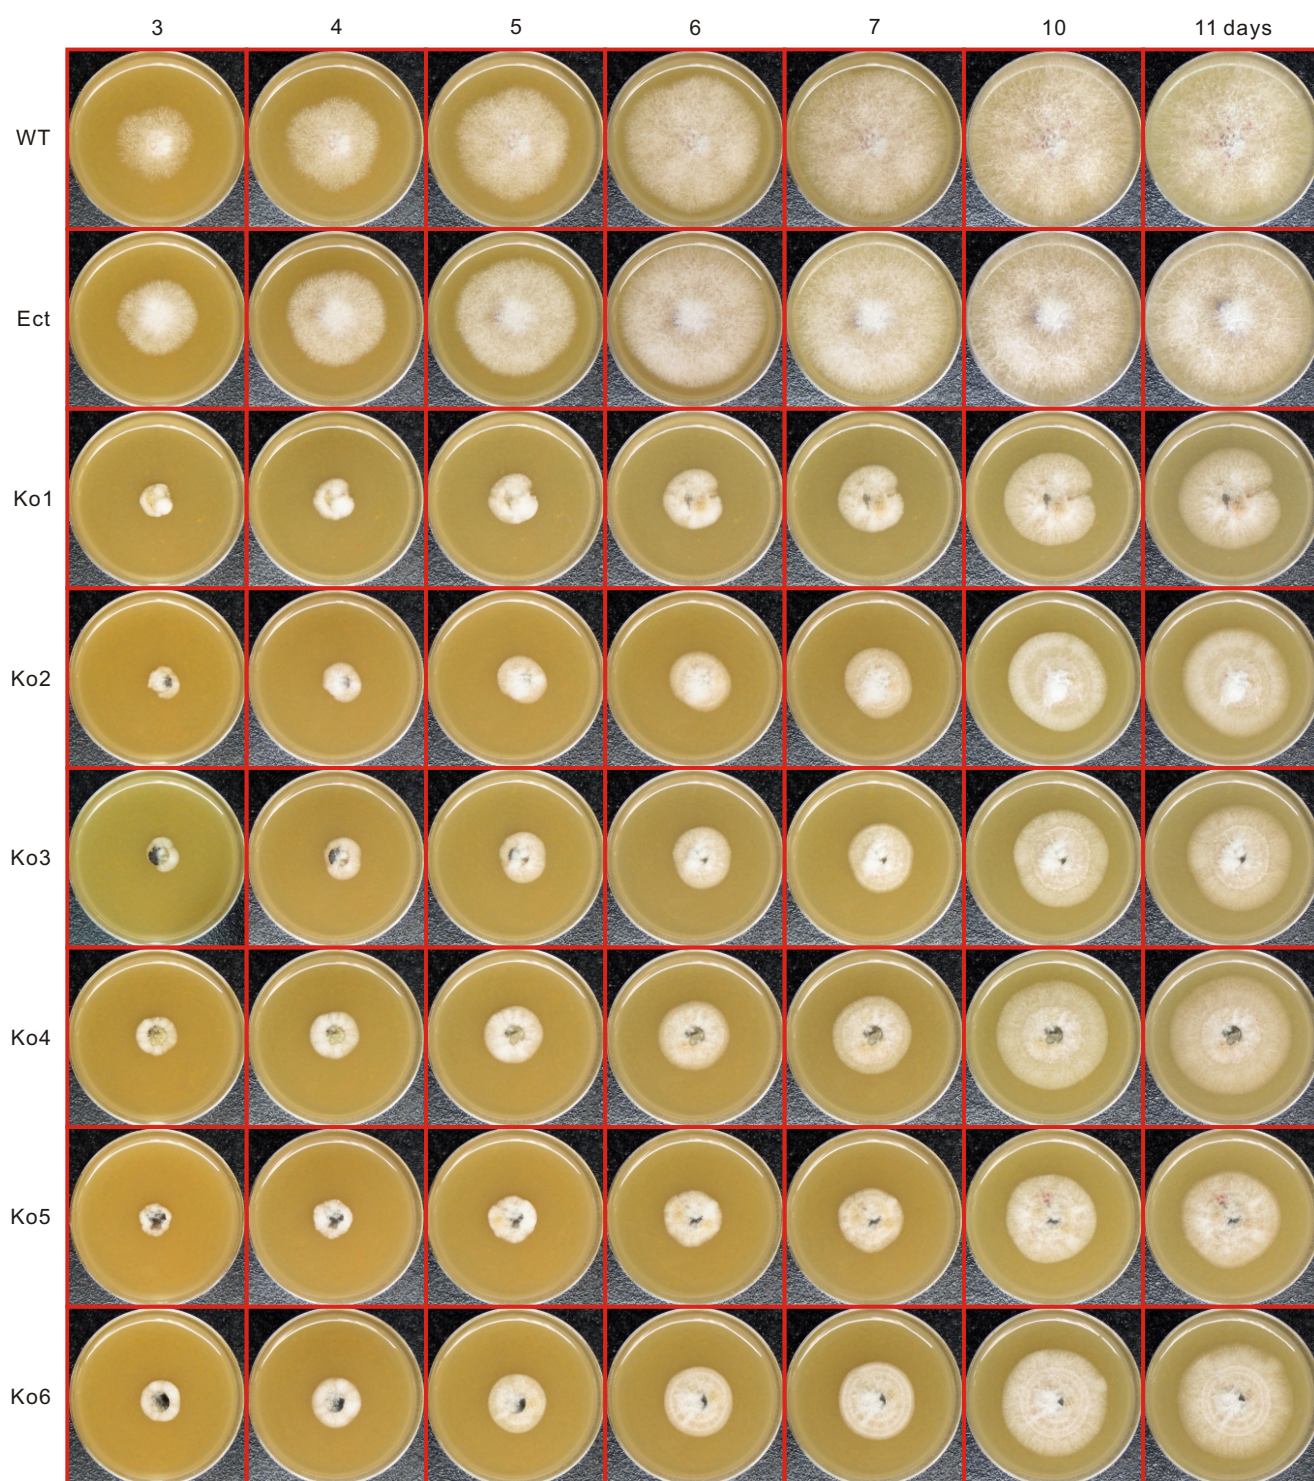

**Figure S3A.** Growth of *L. maculans* strains in minimal media supplemented with 15% V8 juice.

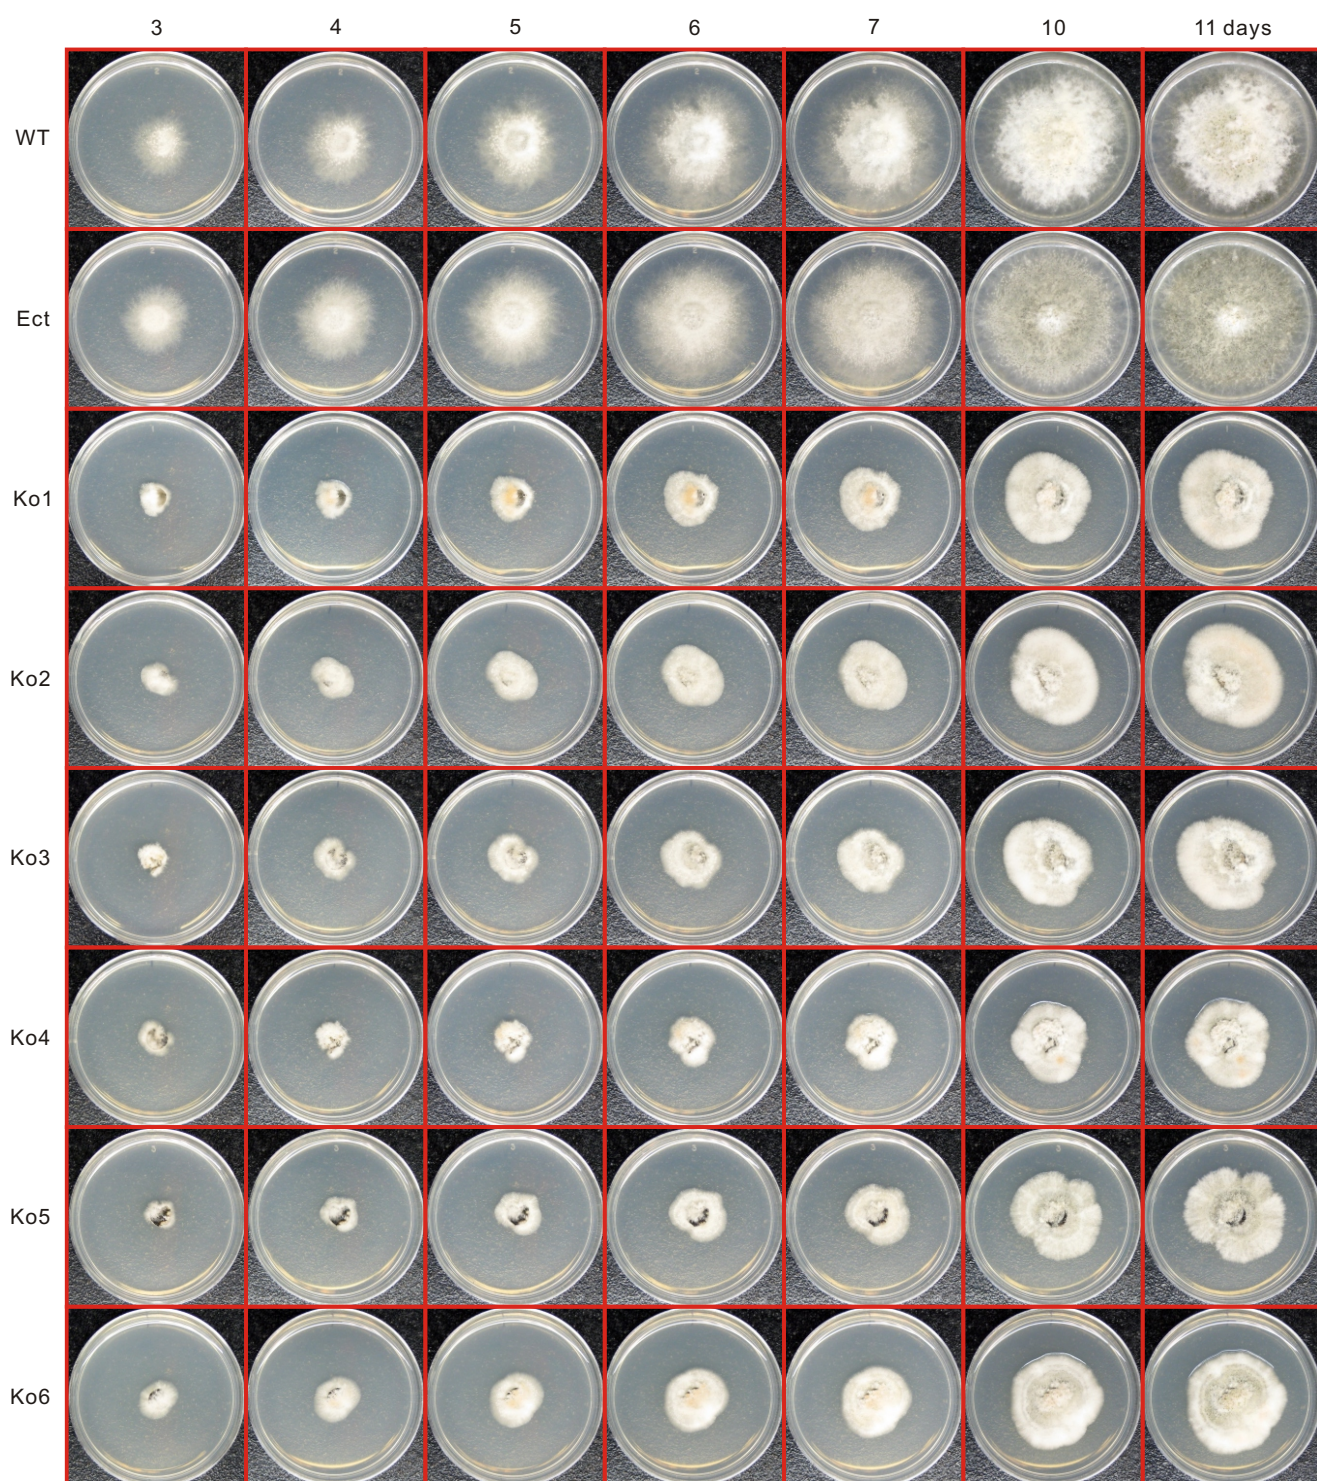

**Figure S3B.** Growth of *L. maculans* strains in minimal media supplemented with 1% glucose.

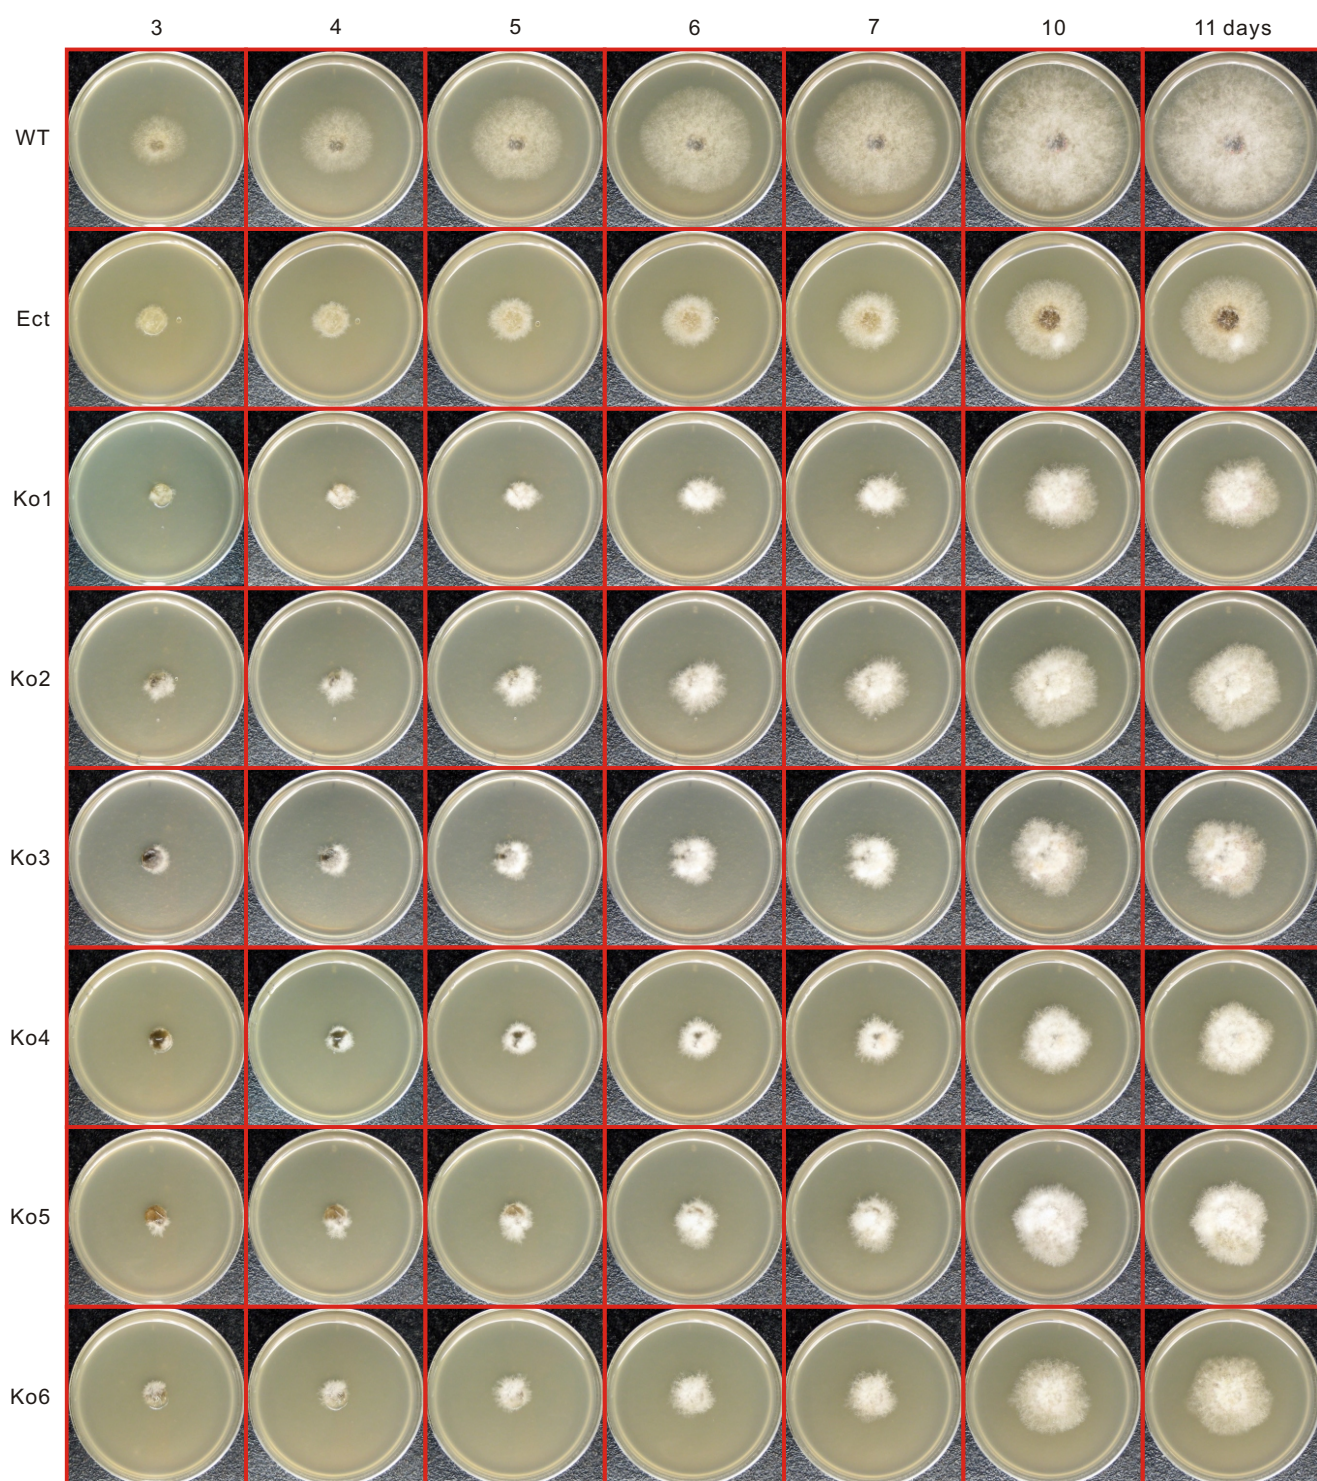

**Figure S3C.** Growth of *L. maculans* strains in minimal media supplemented with 1% pectin.
