# Supplementary material for: The LmSNF1 Gene Is Required for Pathogenicity in the Canola Blackleg Pathogen Leptosphaeria maculans
Source: PubMed Central journal article supplement (PMC3956939; doi:10.1371/journal.pone.0092503), 2014-03-17
Supplement: pone.0092503.s004.pdf [file pone.0092503.s004.pdf]

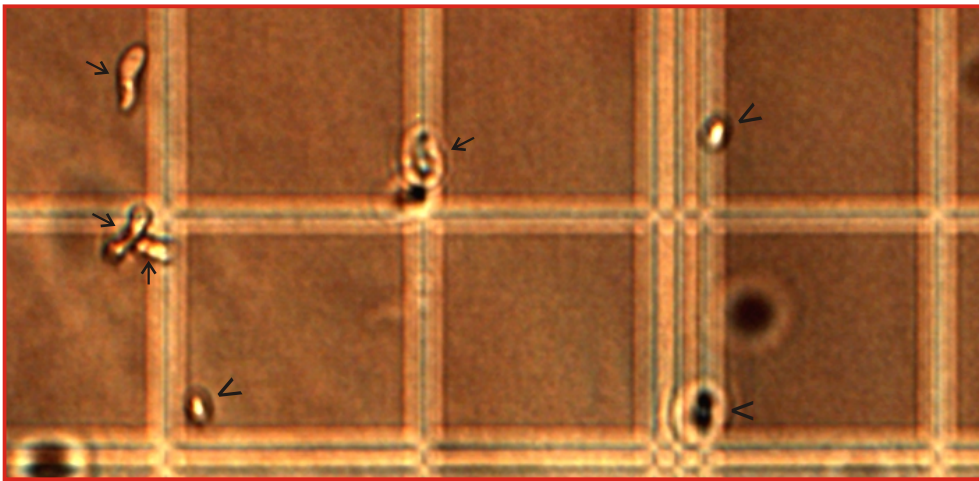

**Figure S4.** Germinated (arrow) and ungerminated (arrow head) conidia of *Leptosphaeria maculans* under microscope ( $10 \times 40$ ).
