# Supplementary material for: The LmSNF1 Gene Is Required for Pathogenicity in the Canola Blackleg Pathogen Leptosphaeria maculans
Source: PubMed Central journal article supplement (PMC3956939; doi:10.1371/journal.pone.0092503), 2014-03-17
Supplement: pone.0092503.s005.pdf [file pone.0092503.s005.pdf]

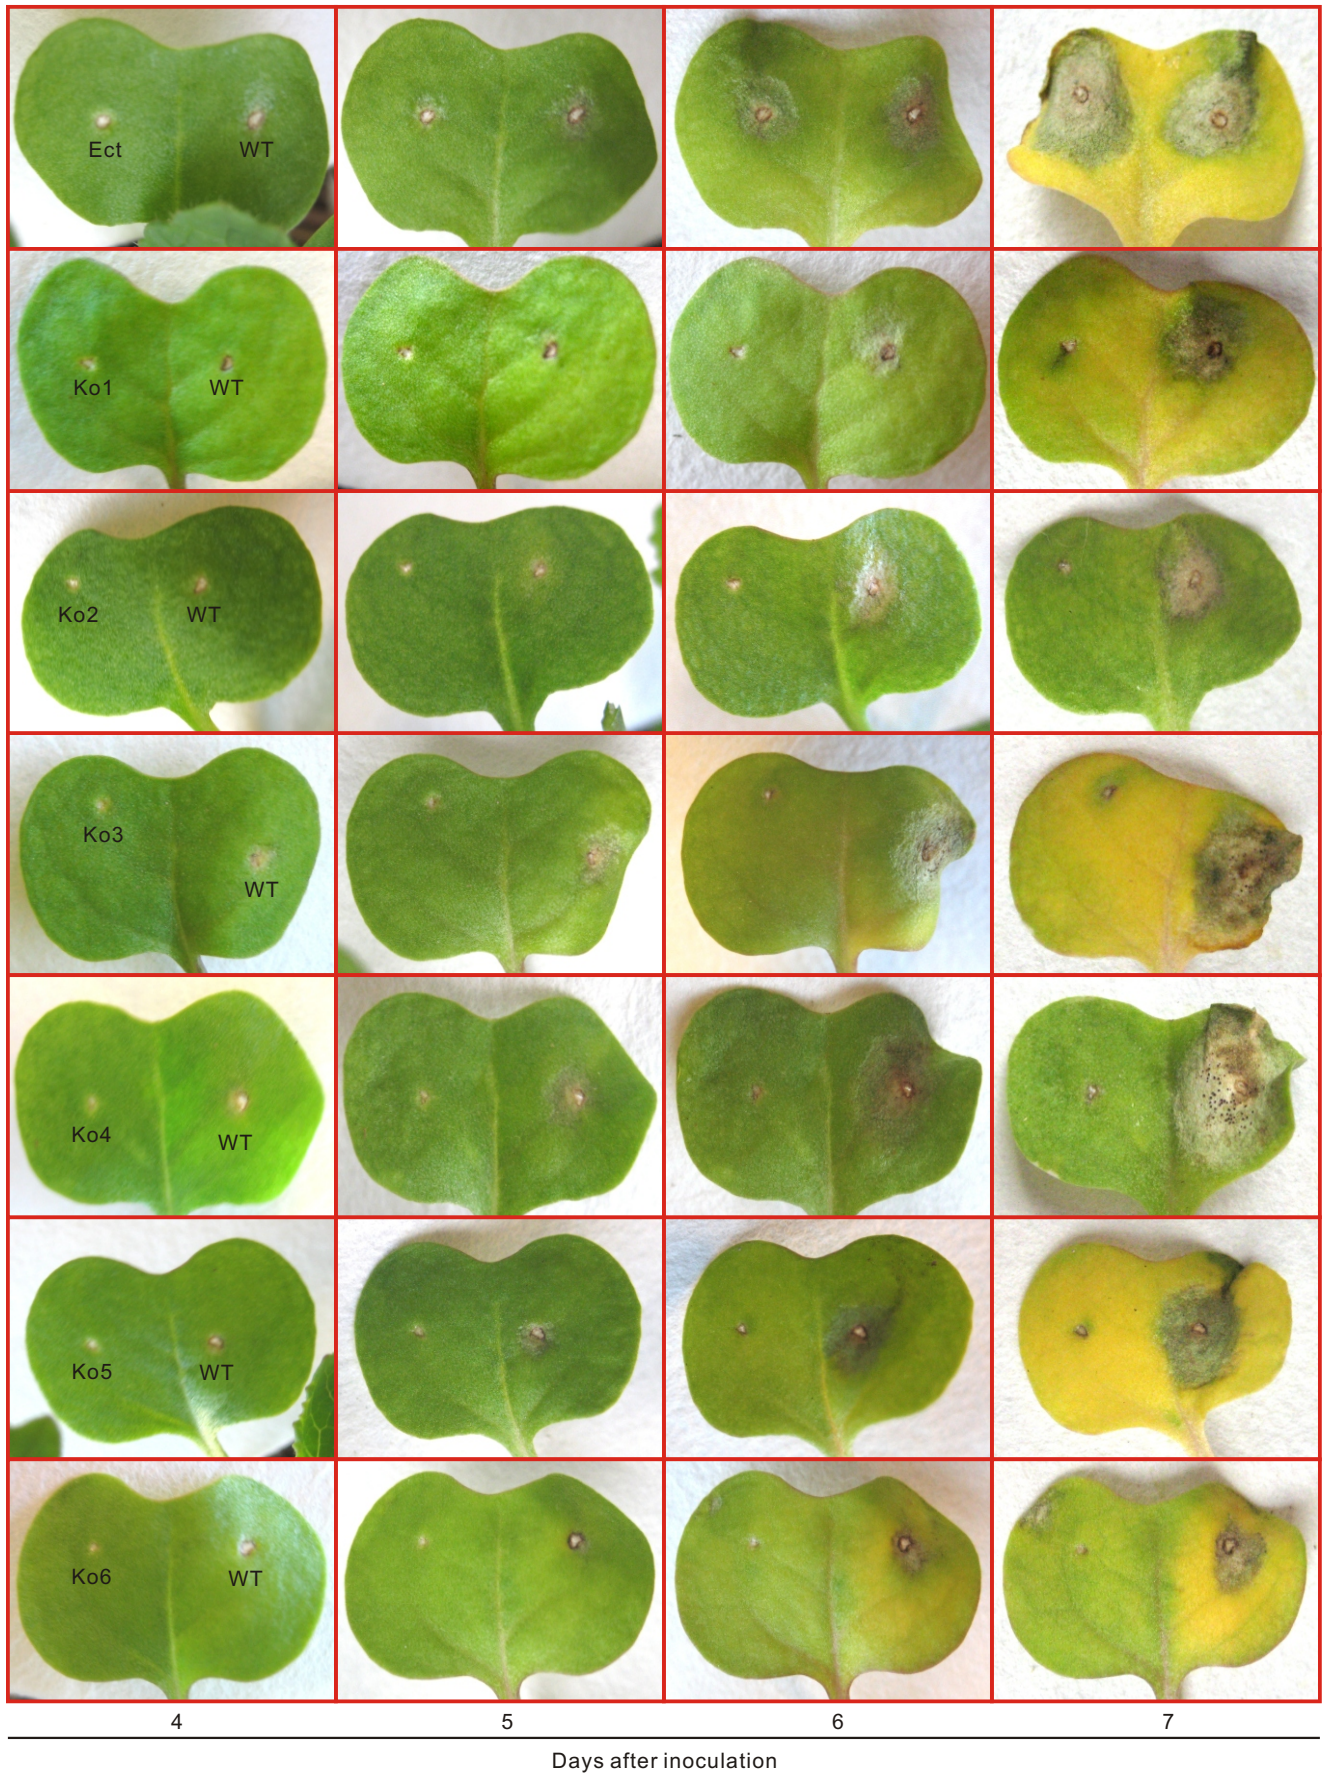

**Figure S5.** Lesion development on canola cotyledons after inoculated with *L. maculans* strains.
