# Supplementary material for: The LmSNF1 Gene Is Required for Pathogenicity in the Canola Blackleg Pathogen Leptosphaeria maculans
Source: PubMed Central journal article supplement (PMC3956939; doi:10.1371/journal.pone.0092503), 2014-03-17
Supplement: pone.0092503.s006.pdf [file pone.0092503.s006.pdf]

**Table S1.** Sequences of primers indicated in Figure 1.

| Name | Sequence                                            | Tailed sequence |
|------|-----------------------------------------------------|-----------------|
| a    | GCGGTTACCAATAGACGAATGCGTTGATCAG                     | BstEII          |
| b    | GCGGTTACCAATCGTTGAGTTGCGGTATTGC                     | BstEII          |
| c    | CTCTGTGGACCACGAAGGAT                                |                 |
| d    | AACATGGATGTTGTGGCTGTGA                              |                 |
| e    | CGTAACTGCACAATGGGAAAGT                              |                 |
| f    | ACTGCAGTCATTGGCAATTGCC                              |                 |
| g    | TTCTTCCAGTCGGTCCCTTATC                              |                 |
| h    | AAACCGTCGAATTCTCTCCA                                |                 |
| i    | GATTGCAGCAGGCAACTACA                                |                 |
| j    | <u>GAAAGCTTGGATCCCCGGGTTTTCACTCTTCCAGTGAGGAGCAA</u> | R-C of z3       |
| k    | <u>GAAAGCTTGGATCCCCGGGTTTTGGTTCGTTGGATGAGGTATAG</u> | R-C of z3       |
| l    | ATATTCAACTCGGCGTCACC                                |                 |
| m    | CAGTCAATTGTGGGTTGACG                                |                 |
| n    | <u>ATGGCCCACGCCAAGATCTGGGGACGACTAGCGACTTGGAAACA</u> | R-C of y1       |
| o    | <u>ATGGCCCACGCCAAGATCTGGGTGGATTTGGGCTGTCAGATAAG</u> | R-C of y1       |
| p    | GCGGGCAAATCTTTAGTGAA                                |                 |
| q    | GTTGAAGAGGGGTGTGCAAT                                |                 |
| r    | ATACTCCTCATACCCATGCGATG                             |                 |
| s    | CGACTAGTGTACACAGCTACCGATGACCTT                      | SpeI            |
| t    | CGACTAGTTATAGCACATGACTATCCAGGC                      | SpeI            |
| u    | TACACAACGCCCTTGTTCTC                                |                 |
| v    | CGGCTTCTTGGTACTTTTGC                                |                 |
| w    | GCGGTTACCCAAACATACGTACAGCACAGCA                     | BstEII          |
| x    | GCGGTTACCATGTGTTGTCACAGTCAAACCA                     | BstEII          |
| y1   | CCCAGATCTTGGCGTGGGCCATTGTGCATGG                     | BglII           |
| y2   | GCGGTTACCAATTGTCCGTCAGGACATTGTTG                    | BstEII          |
| y3   | GCGGTTACCCAAGACCAATGCGGAGCATATA                     | BstEII          |
| z1   | GCGGTTACCAAGAATCTCGTGCTTTCAGCTT                     | BstEII          |
| z2   | GCGGTTACCAGATCGTTATGTTTATCGGCAC                     | BstEII          |
| z3   | AAACCCGGGGATCCAAGCTTTCGAGTGGAGAT                    | XmaI            |
