# Supplementary material for: The LmSNF1 Gene Is Required for Pathogenicity in the Canola Blackleg Pathogen Leptosphaeria maculans
Source: PubMed Central journal article supplement (PMC3956939; doi:10.1371/journal.pone.0092503), 2014-03-17
Supplement: pone.0092503.s007.pdf [file pone.0092503.s007.pdf]

**Table S2.** Primers for CWDEs and pathogenicity genes.

| <b>Name</b> | <b>Forward primer</b> | <b>Reverse primer</b> | <b>Expected size (bp)</b> |
|-------------|-----------------------|-----------------------|---------------------------|
| CBX90811    | CAACTACGGGGGCTTGAATA  | CTCTGCAGCTCAGCAATCAG  | 159                       |
| CBX92557    | CAGGCGTGTTTCTGGAACTT  | TTGAGGGTACCACCGTTCTC  | 126                       |
| CBY02118    | TGGCCATACAAGTGGTTTGA  | CTGGCCTTGGTCGAGAGTAG  | 153                       |
| CBX99296    | TGTCTATACGCCCAACACCA  | CAGGATGCAGTGACAGAGGA  | 159                       |
| CBX90808    | GACTCATCATCAGCCCCATT  | GCTACATCGAGGGAGCTACG  | 133                       |
| CBX91774    | TGCACTAGCCTACGACGATG  | GAGCGGCTTTTTGGTTGTAG  | 134                       |
| CBX92723    | CCAGCCAAGAACATCTCCAT  | CAGCCAGATTCTCGTTCACA  | 154                       |
| CBX93727    | CAATCCAAACATGCAAATCG  | TTATGCGTGTACGTGGCAAT  | 120                       |
| CBY01967    | CGAGGCTGGTAATTTTCGGTA | TCAGCAAGATACTGCGGTTG  | 140                       |
| CBY00718    | GGAGGACGGTTATTGGAGGT  | CGAGCAATTCGACAAGAACA  | 141                       |
| CBX93703    | AGAAACACCCGTCACCTTTG  | GGAATTTTGCAGCCACAAGT  | 160                       |
| CBX90249    | CCAGGAAGCTCTTCAACGTC  | GATTCACCGAAGATCAGA    | 146                       |
| AAM89498    | GGACACATGGCTGGAAAAGT  | CGTGGGTCGATTGTAGAGGT  | 158                       |
| AAP40632    | CCAGATCCGCATCTACCTGT  | CCGCAATTCATGGAGAGAT   | 100                       |
| AM933613    | TGACTGGTGACGGTGTCAAT  | ATCTGGCGAGCAGTCTTGAT  | 160                       |
