# Supplementary material for: The LmSNF1 Gene Is Required for Pathogenicity in the Canola Blackleg Pathogen Leptosphaeria maculans
Source: PubMed Central journal article supplement (PMC3956939; doi:10.1371/journal.pone.0092503), 2014-03-17
Supplement: pone.0092503.s008.pdf [file pone.0092503.s008.pdf]

**Table S3.** Expression of selected CWDE and pathogenicity genes in *Leptosphaeria maculans* after cultured in minimal medium supplemented with 1% glucose or in infected canola cotyledons at 4 day after inoculation.

| #  | GenBank Number | Gene description           | Expression relative to <i>ACT1</i> |           |                      | <i>In Planta</i> Activation |
|----|----------------|----------------------------|------------------------------------|-----------|----------------------|-----------------------------|
|    |                |                            | Glucose                            | 4 dai     | P value <sup>a</sup> |                             |
| 1  | CBX90811       | Pectate lyase              | No                                 | 0.9±0.2   | NA                   | Y                           |
| 2  | CBX92557       | Pectate lyase              | 0.3±0.1                            | 1.7±0.3   | 0.004                | Y                           |
| 3  | CBY02118       | Rhamnogalacturonate lyase  | No                                 | 2.8±0.7   | NA                   | Y                           |
| 4  | CBX99296       | Pectin or pectate lyase    | 0.4±0.1                            | 2.4±0.1   | 0.002                | Y                           |
| 5  | CBX90808       | Carbohydrate esterase      | No                                 | 1.8±0.9   | NA                   | Y                           |
| 6  | CBX91774       | Chitin deacetylase         | 0.8±0.4                            | 17.1±3.4  | 0.007                | Y                           |
| 7  | CBX92723       | SGNH hydrolase             | No                                 | 0.8±0.1   | NA                   | Y                           |
| 8  | CBX93727       | SGNH hydrolase             | 0.2±0.1                            | 5.9±0.4   | 0.003                | Y                           |
| 9  | CBY01967       | Beta-1,3-glucanase         | No                                 | 8.8±1.3   | NA                   | Y                           |
| 10 | CBY00718       | Glucosidase                | No                                 | 7.9±1.9   | NA                   | Y                           |
| 11 | CBX93703       | Glycoside hydrolase        | No                                 | 4.9±1.8   | NA                   | Y                           |
| 12 | CBX90249       | Glycogen debranching       | 1.1±0.2                            | 2.0±0.6   | 0.178                | N                           |
| 13 | AAM89498       | Isocitrate lyase           | No                                 | 43.0±10.1 | NA                   | Y                           |
| 14 | AAP40632       | Pathogenicity protein LopB | 0.1±0.1                            | 3.5±1.1   | 0.003                | Y                           |
| 15 | AM933613       | Plasma membrane ATPase     | 1.4±0.2                            | 48.3±7.8  | 0.009                | Y                           |

<sup>a</sup> P value of F test (n=3).
